# Supplementary material for: Design and Validation of a Gene-Targeted, Next-Generation Sequencing Panel for Routine Diagnosis in Gliomas
Source: PubMed Central journal article supplement (PMC6627812; doi:10.3390/cancers11060773), 2019-06-04
Supplement: cancers-11-00773-s001.pdf [file cancers-11-00773-s001.pdf]

Supplementary Material

# Design and Validation of a Gene-Targeted, Next-Generation Sequencing Panel for Routine Diagnosis in Gliomas

Nicky D’Haene, Bárbara Meléndez, Oriane Blanchard, Nancy De Nève, Laetitia Lebrun, Claude Van Campenhout and Isabelle Salmon

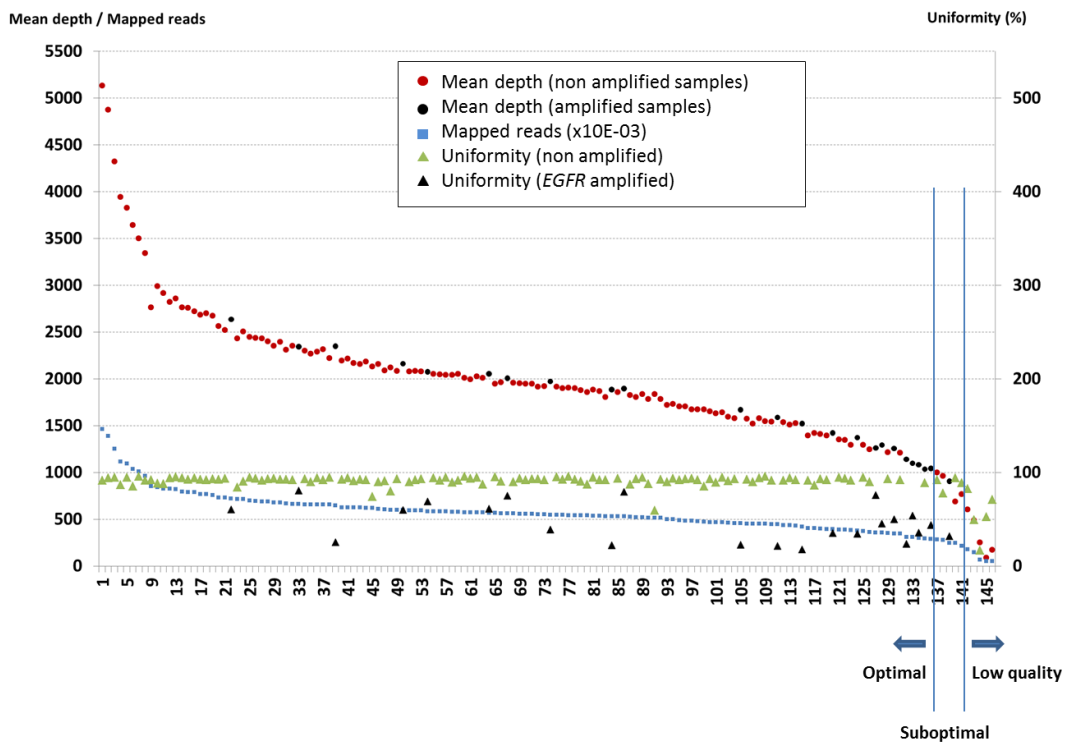

**Figure S1.** Graphical representation, for each sample, of the mean depth, mapped reads, and uniformity obtained in the NGS assays. Squares indicate the number of mapped reads, dots indicate the mean depth, and triangles indicate percentage of uniformity (note that in order to represent two of the variables under the same scale, the real mapped read values are 1000 times more than what is specified in the y-axis). The different colors are used to distinguish samples with *EGFR* amplification (black).

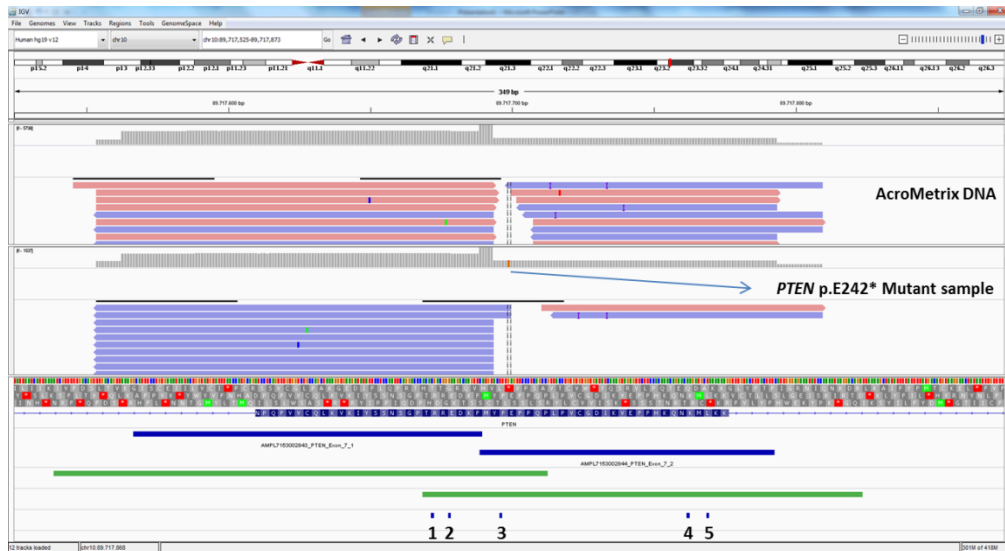

**Figure S2.** Visualization using Integrative Genomic Viewer of the AcroMetrix engineered DNA and a *PTEN* mutant sample. The green bars represent the length of the whole amplicons (insert and primers), while the blue bars above them represent the insert amplicons without the primers. The position of the described AcroMetrix mutations in the region are indicated by the blue squares and numbered 1 to 5. As shown, the variants 1 and 2 are located in the primer sequence of the right amplicon, and interfere with its amplification and the detection of variants 3, 4, and 5. Similarly, variant 3 is located in the primer sequence of the left amplicon, and impedes the amplification and detection of variants 1 and 2 that are located in the amplicon.

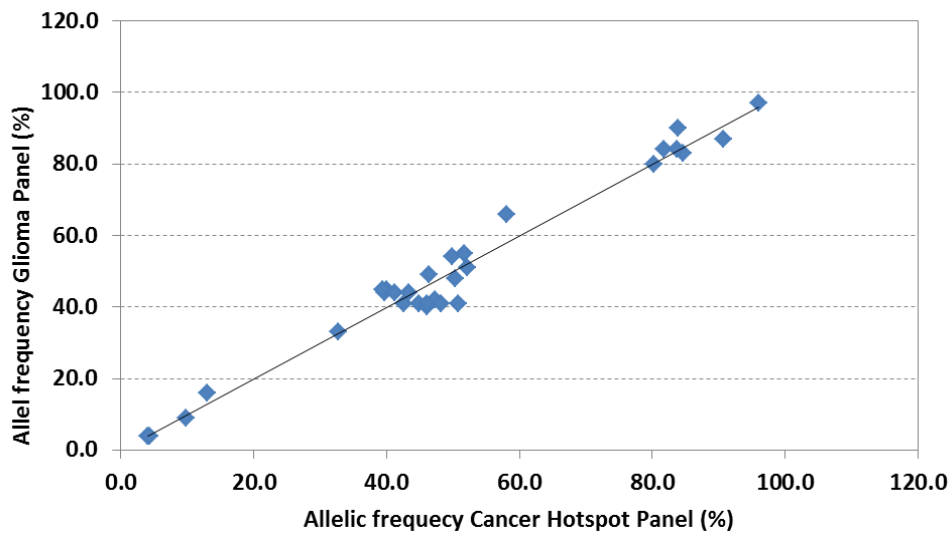

**Figure S3.** Comparative analyses of the allelic frequencies obtained with the cancer hotspot and glioma NGS panels. Allelic frequencies of 33 mutations from 22 glioma samples that were assessed for mutation detection with the CHP and glioma panels showed a high correlation between both panels ( $R = 0.99$ ), even for those variants with an AF close to the limit of detection (4%).

**Table S1.** Validation of the NGS 1p/19q codeletion detection by fluorescence in situ hybridization (FISH).

| NGS LOH Patterns | FISH Results      |               |          |         |       |
|------------------|-------------------|---------------|----------|---------|-------|
|                  | 1p/19q Codeletion | No Codeletion | 1p36 del | 19q del | Total |
| 1p/19q LOH       | 21                | 0             | 0        | 0       | 21    |
| No LOH           | 1                 | 18            | 1        | 0       | 20    |
| LOH 1q           | 0                 | 0             | 3        | 0       | 3     |
| LOH 19q          | 0                 | 0             | 0        | 5       | 5     |
| Whole chr 1 LOH  | 0                 | 2             | 0        | 0       | 2     |
| Whole chr 19 LOH | 0                 | 6             | 1        | 0       | 7     |
| Other patterns   | 0                 | 2             | 0        | 0       | 2     |
| Noninformative   | 0                 | 3             | 1        | 1       | 5     |
| Total            | 22                | 31            | 6        | 6       |       |

**Table S2.** Summary of samples and patients included in the study.

| Subtype                                           | WHO Grade | Samples |            |             | Patients |            |             |
|---------------------------------------------------|-----------|---------|------------|-------------|----------|------------|-------------|
|                                                   |           | Total   | Validation | Prospective | Total    | Validation | Prospective |
| Pilocytic                                         | I         | 8       | 1          | 7           | 8        | 1          | 7           |
| Oligodendroglioma IDH mutant,<br>1p/19q codeleted | II        | 15      | 11         | 4           | 14       | 10         | 4           |
|                                                   | III       | 10      | 6          | 4           | 9        | 6          | 3           |
| Astrocytoma, IDH mutant                           | II        | 14      | 6          | 8           | 11       | 4          | 7           |
|                                                   | III-IV    | 17      | 7          | 10          | 14       | 7          | 7           |
| Astrocytoma, IDH wildtype                         | II        | 8       | 0          | 8           | 5        | 0          | 5           |
|                                                   | III-IV    | 52      | 16         | 36          | 50       | 14         | 36          |
| Glioblastoma-H3.3 K27M mutant                     | IV        | 5       | 3          | 2           | 5        | 3          | 2           |
| Other diagnosis                                   |           | 10      | 1          | 9           | 9        | 1          | 8           |
| Glioneuronal tumor                                |           | 3       | 1          | 2           | 2        | 1          | 1           |
| Subependymal giant cell astrocytoma               |           | 1       | 0          | 1           | 1        | 0          | 1           |
| Tumor vs non tumor                                |           | 5       | 0          | 5           | 5        | 0          | 5           |
| Undifferentiated tumor                            |           | 1       | 0          | 1           | 1        | 0          | 1           |
| Non classified*                                   |           | 4       | 1          | 3           | 4        | 1          | 3           |
| Total                                             |           | 143     | 52         | 91          | 129      | 47         | 82          |

\*These cases could not be classified according to the 2016 WHO, due to inconclusive NGS results.

**Table S3.** SNPs used in the 1p/19q LOH analysis.

| <b>Chromosome arm</b> | <b>Start*</b> | <b>SNP</b> | <b>Chromosome arm</b> | <b>Start*</b> | <b>SNP</b> |
|-----------------------|---------------|------------|-----------------------|---------------|------------|
| <b>Chr 1p</b>         | 16112795      | rs7663     | <b>Chr 19p</b>        | 751553        | rs13345388 |
|                       | 19683301      | rs169957   |                       | 2720281       | rs7256720  |
|                       | 23210600      | rs309481   |                       | 5063649       | rs36115836 |
|                       | 26213991      | rs159525   |                       | 6818628       | rs164020   |
|                       | 29245406      | rs157208   |                       | 8990761       | rs57167556 |
|                       | 36168038      | rs6425953  |                       | 10265248      | rs2114724  |
|                       | 40306898      | rs7315     |                       | 12505873      | rs7246440  |
|                       | 45976472      | rs7903     |                       | 15120104      | rs10419689 |
|                       | 53307957      | rs504816   |                       | 16842052      | rs8107776  |
|                       | 55316322      | rs7374     |                       | 18108956      | rs4808732  |
|                       | 60594980      | rs87061    | <b>Chr 19q</b>        | 30106659      | rs7283     |
|                       | 65952428      | rs11811946 |                       | 31883906      | rs2542297  |
|                       | 71477315      | rs5680     |                       | 34011248      | rs33841    |
|                       | 76990862      | rs191142   |                       | 35615179      | rs12852    |
|                       | 88776278      | rs54396    |                       | 38229378      | rs1291     |
|                       | 91604522      | rs106075   |                       | 39926509      | rs17628    |
|                       | 95394352      | rs1132     |                       | 40931717      | rs166539   |
|                       | 101338324     | rs8888     |                       | 44090195      | rs3817     |
|                       | 109289487     | rs6604120  |                       | 47112648      | rs10113    |
|                       | 115110683     | rs8128     |                       | 48833800      | rs8355     |
| <b>Chr 1q</b>         | 156030820     | rs2275073  | 51359497              | rs11573       |            |
|                       | 162301446     | rs347303   | 53073605              | rs193040      |            |
|                       | 170198294     | rs4575136  | 53611187              | rs3814        |            |
|                       | 181286871     | rs898114   | 56030428              | rs10217       |            |
|                       | 189241655     | rs1342566  | 59093239              | rs10448       |            |
|                       | 195608036     | rs12744553 |                       |               |            |
|                       | 204839154     | rs2802849  |                       |               |            |
|                       | 210951585     | rs1770214  |                       |               |            |
|                       | 219383192     | rs6692892  |                       |               |            |
|                       | 228876199     | rs16848862 |                       |               |            |
|                       | 156030820     | rs2275073  |                       |               |            |
|                       | 162301446     | rs347303   |                       |               |            |
|                       | 170198294     | rs4575136  |                       |               |            |
|                       | 181286871     | rs898114   |                       |               |            |
|                       | 189241655     | rs1342566  |                       |               |            |

\*Start position according to GRCh37 (hg19).
